# Supplementary material
Source: PubMed Central journal article supplement (PMC7159998)
Supplement: NIHMS1561193-supplement-Revised__with_caption_1.pdf [file NIHMS1561193-supplement-Revised__with_caption_1.pdf]

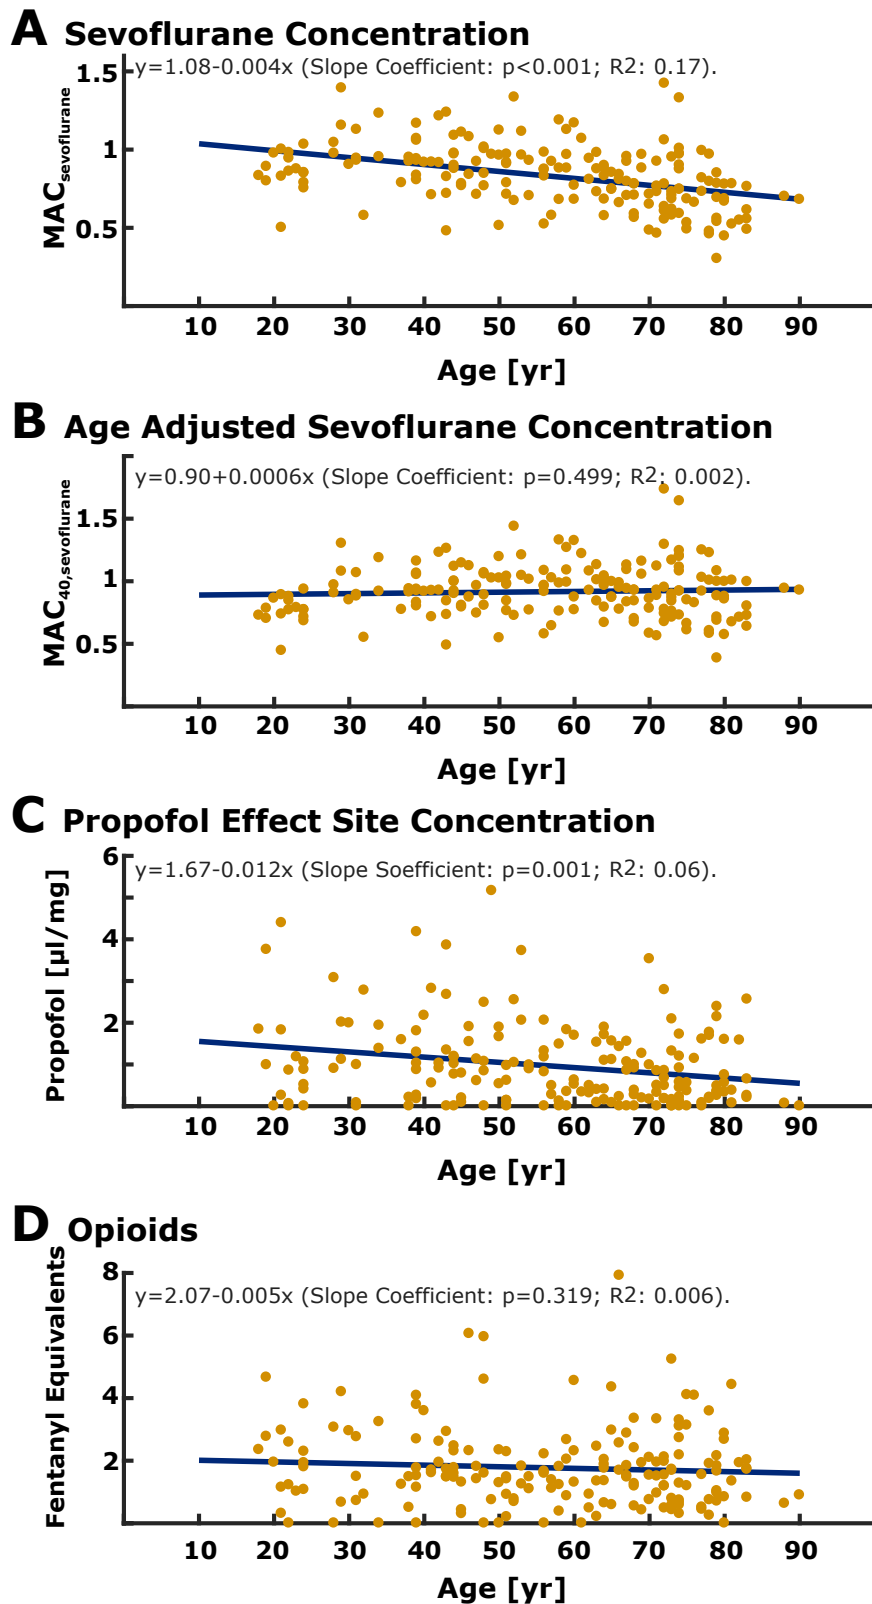

**Figure S1: Different drug concentrations versus age; yr: year**

- A) There was a significant linear trend between sevoflurane MAC and age, before age adjustment.
- B) After age adjustment according to Mapleson<sup>19</sup> there was no significant trend for sevoflurane MAC and age.
- C) There was a significant trend with residual propofol and age.
- D) There was no significant trend between opioids delivered and age.

In the regression plots, the yellow dots present the single patients and the blue line the linear fit.  
 yr: year
