# Supplementary material
Source: PubMed Central journal article supplement (PMC7159998)
Supplement: NIHMS1561193-supplement-Revised__with_caption_2.pdf [file NIHMS1561193-supplement-Revised__with_caption_2.pdf]

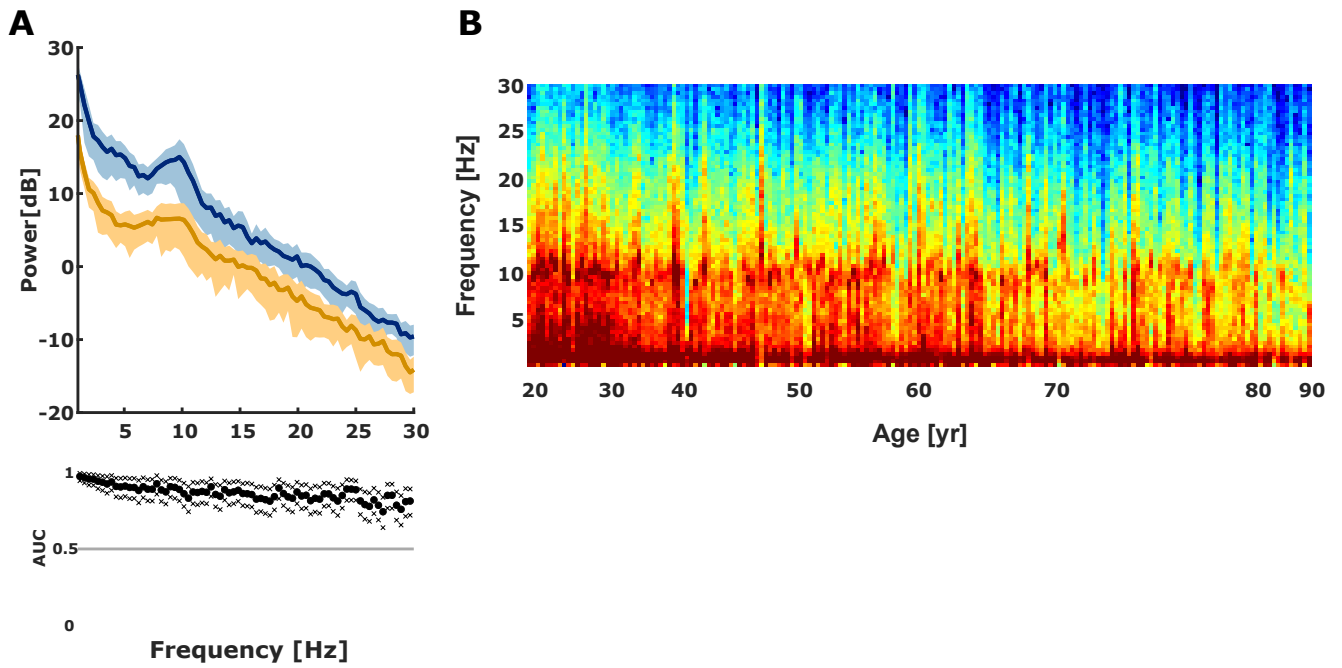

**Figure S2: Power spectral density of the youngest and oldest quartile and the entire data set**

A) Median ( $\pm$ median absolute deviation) power spectral density plots of EEG derived from the 46 youngest (blue) and 46 oldest (yellow) patients of the data set.

Power spectral density is presented with corresponding AUC values and bootstrapped 95% confidence intervals.

Solid dots indicate a significant difference between old and young.

B) Absolute power spectral density PSD for each single patient, sorted by age displayed as heat map or spectral array. With age the colors tend to become colder in all frequencies, reflecting the age-dependent decrease in spectral power.

yr: year
