# Supplementary material
Source: PubMed Central journal article supplement (PMC7159998)
Supplement: NIHMS1561193-supplement-Revised__with_caption_3.pdf [file NIHMS1561193-supplement-Revised__with_caption_3.pdf]

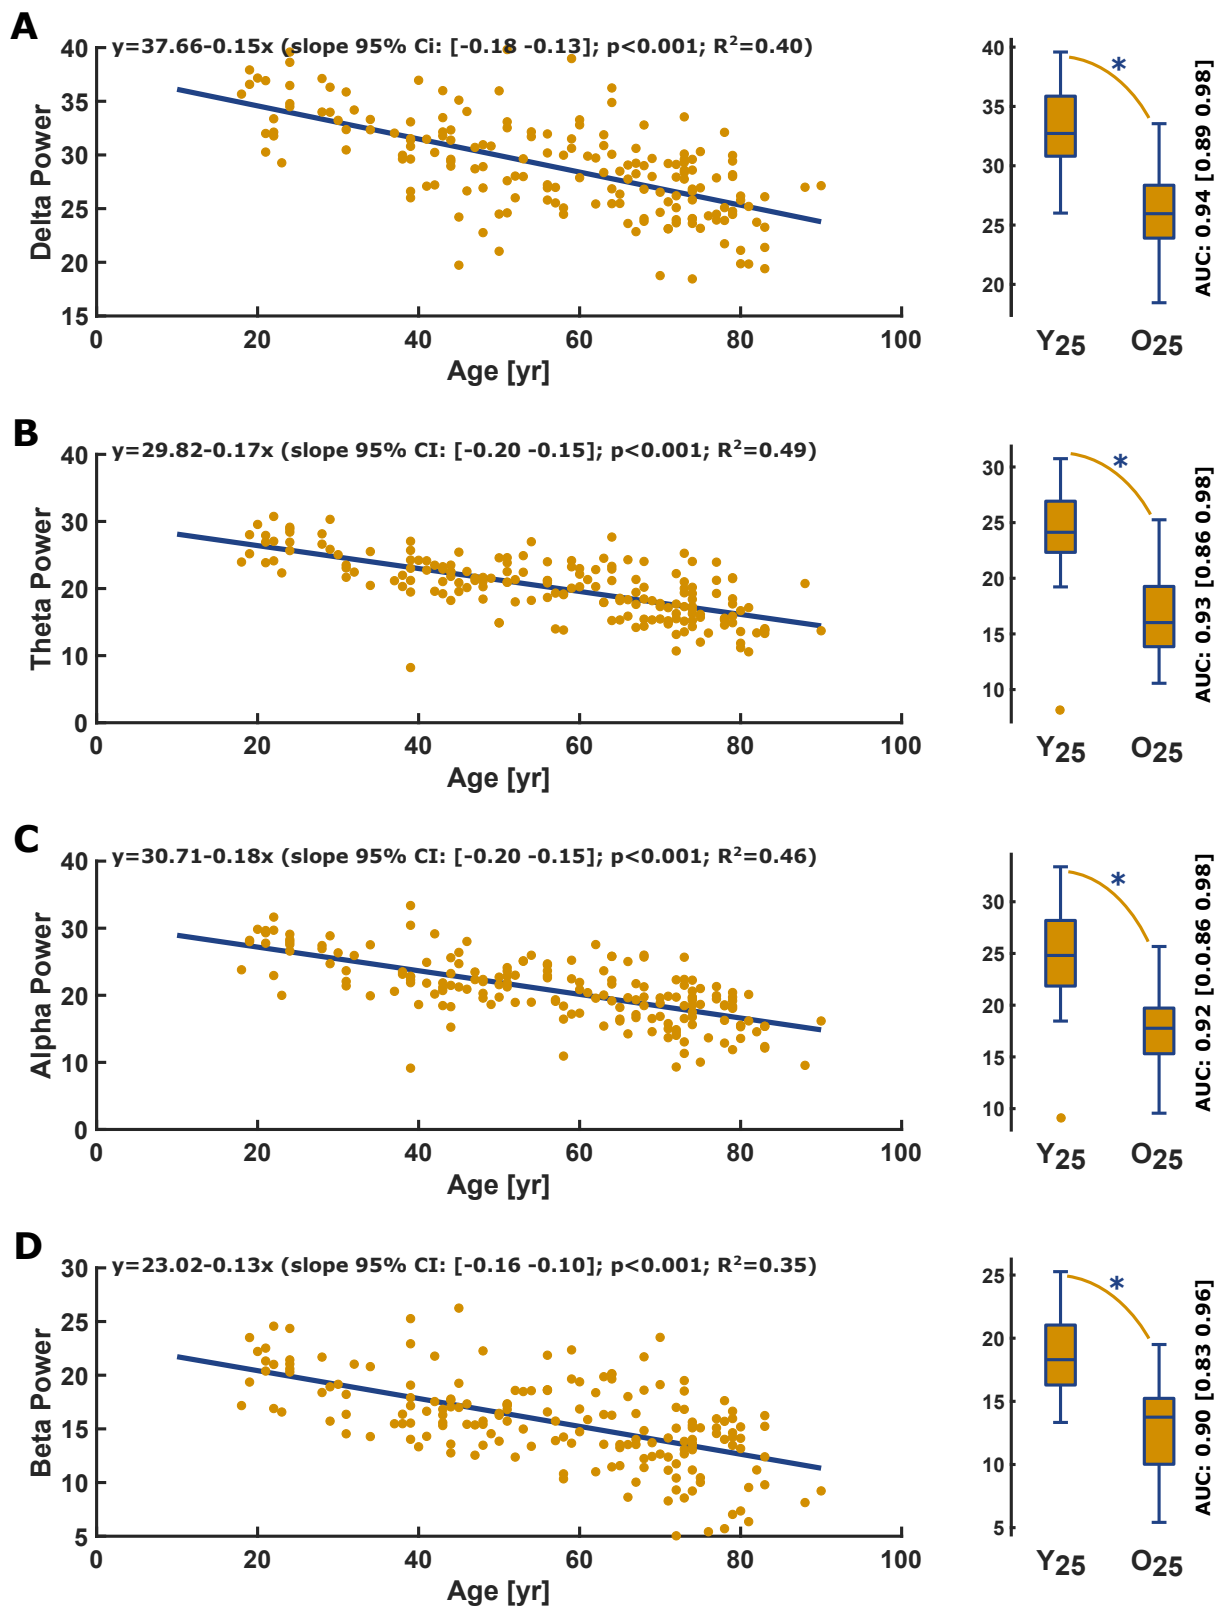

**Figure S3: Power spectral density measures vs. age: Power vs. age and corresponding youngest vs. oldest quartile box plot for the delta power(A), the theta power (B), EEG alpha power (C) and the EEG beta power (D).**

- A) Delta power decreased with age ( $p<0.001$ , t-statistic -10.99) and age had an excellent and significant ( $p<0.001$ , (AUC=0.94 [0.89 0.98])) effect as depicted in the Y25 vs. O25 boxplot.
- B) Theta power decreased with age ( $p<0.001$ , t-statistic -13.13) and age had an excellent and significant ( $p<0.001$ , (AUC=0.93 [0.86 0.98])) effect as depicted in Y25 vs. O25 boxplot.
- C) Power in the alpha-band significantly ( $p<0.001$ , t-statistic -12.25) decreased with age. Age had had an excellent and significant ( $p<0.001$ , AUC=0.92 [0.86 0.98]) effect on absolute alpha-band power as depicted in Y25 vs. O25 boxplot
- D) EEG beta power significantly ( $p<0.001$ , t-statistic -9.74) decreased with age. had an excellent and significant (AUC=0.90 [0.83 0.96]) and significant ( $p<0.001$ ) effect as depicted in Y25 vs. O25 boxplot.

In the regression plots, the yellow dots present the single patients and the blue line the linear fit.

Y25: youngest 25% O25: oldest 25%; yr: year
