# Supplementary material
Source: PubMed Central journal article supplement (PMC7159998)
Supplement: NIHMS1561193-supplement-Revised__with_caption_4.pdf [file NIHMS1561193-supplement-Revised__with_caption_4.pdf]

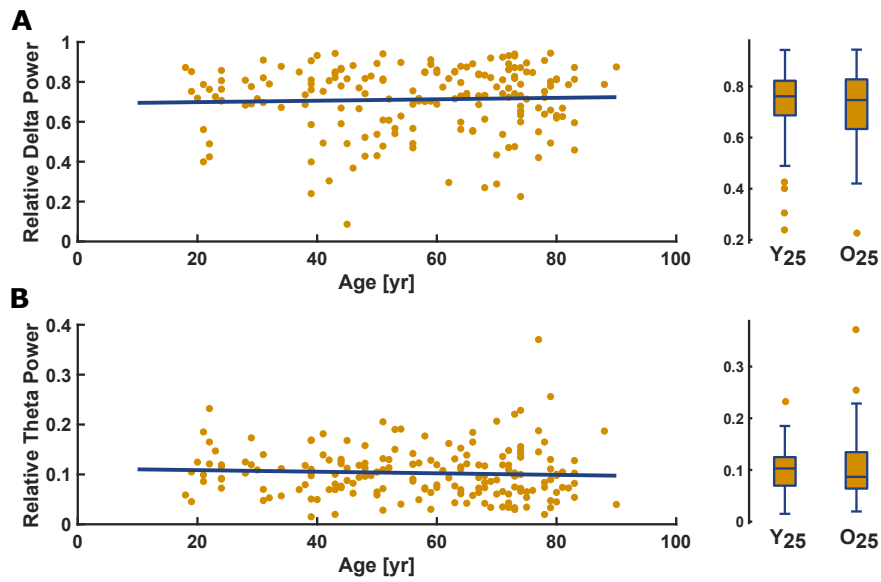

**Figure S4: Linear regression and box plots of the youngest vs. the oldest quartile for the (A) relative EEG delta power and the (B) relative EEG theta power.**

Neither of them showed an age-related trend.

In the regression plots, the yellow dots present the single patients and the blue line the linear fit.

Y25: youngest 25% O25: oldest 25%; yr: year
