# Supplementary material
Source: PubMed Central journal article supplement (PMC7159998)
Supplement: NIHMS1561193-supplement-Revised__with_caption_5.pdf [file NIHMS1561193-supplement-Revised__with_caption_5.pdf]

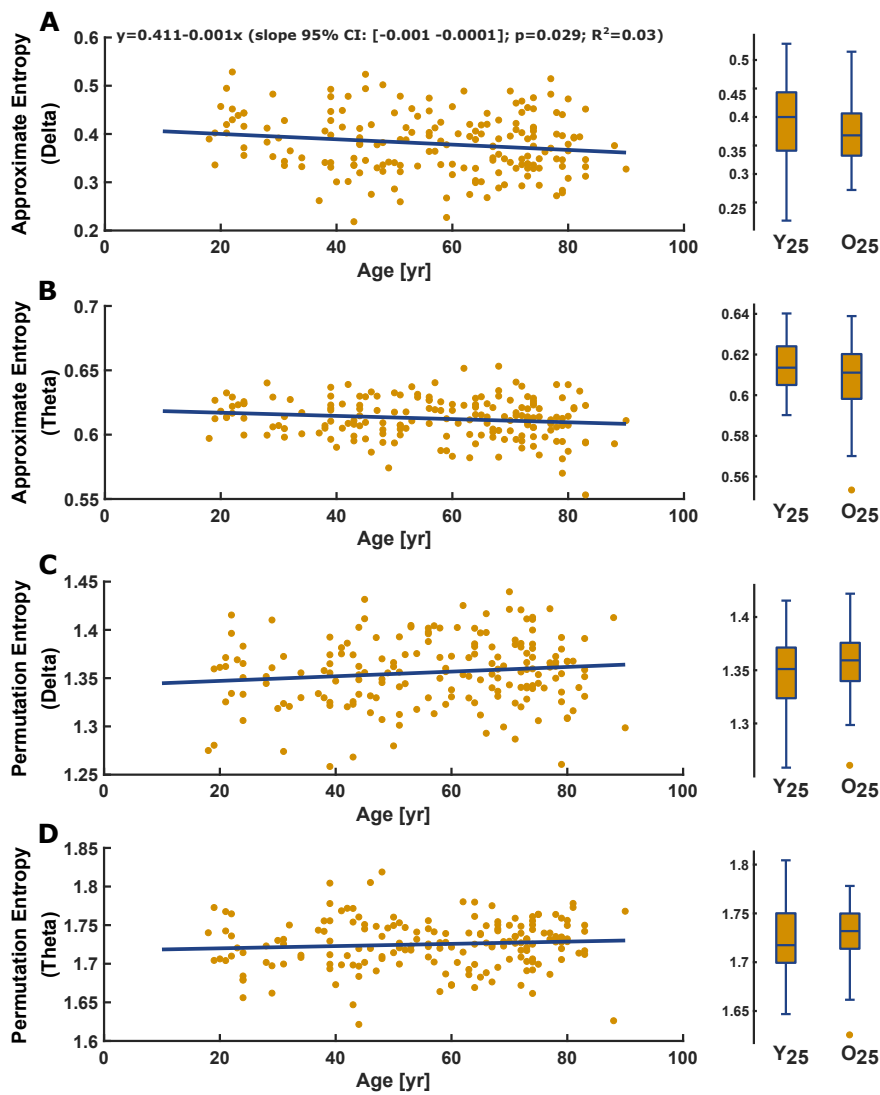

**Figure S5: Age-induced change of approximate entropy and permutation entropy in the slow dynamics, i.e., the delta and theta range of the EEG.**

A) Approximate entropy decreased with age ( $p=0.029$ ,  $t$ -statistic:  $-2.20$ ), but the fit was quite poor with  $R^2=0.03$ . The comparison of Y25 vs. O25 did not reveal a significant difference

B) Approximate entropy did not show an age-induced trend in the EEG theta range

C) Age did not influence permutation entropy, when applied to the EEG filtered to the delta range.

D) Age did not influence permutation entropy, when applied to the EEG filtered to the theta range.

In the regression plots, the yellow dots present the single patients and the blue line the linear fit.

In the boxplots, the circles indicate outliers as defined by the MATLAB plotting routine.

They were not excluded from analysis. Y25: youngest 25% O25: oldest 25%; yr: year
