# Supplementary material
Source: PubMed Central journal article supplement (PMC7159998)
Supplement: NIHMS1561193-supplement-Revised__with_caption_6.pdf [file NIHMS1561193-supplement-Revised__with_caption_6.pdf]

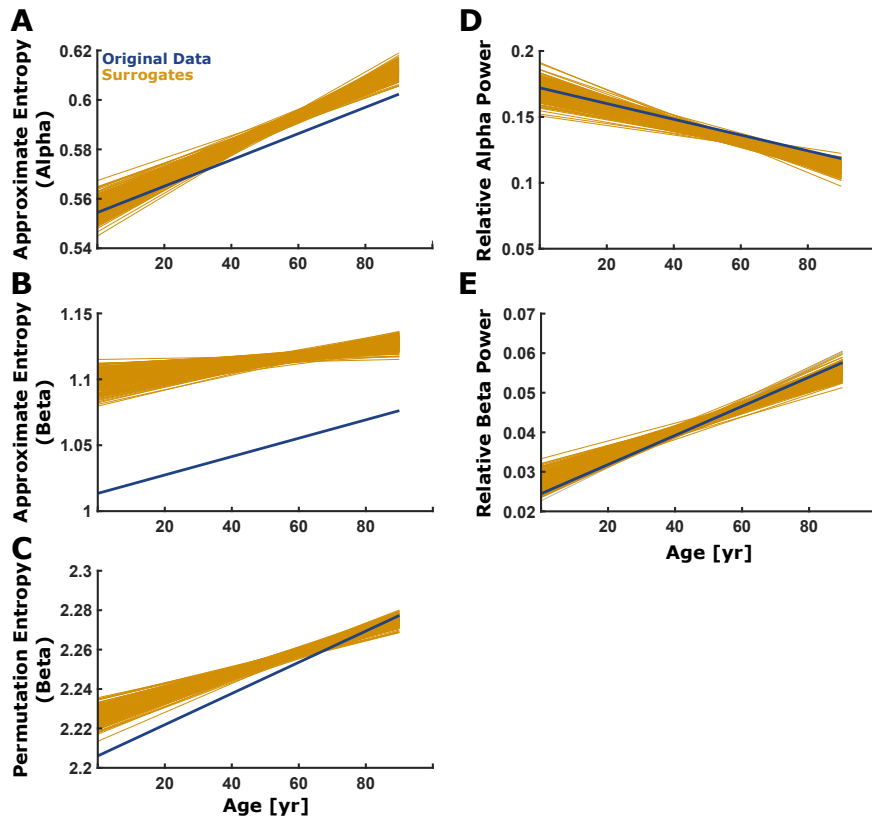

**Figure S6: Results from the phase-randomized surrogate analysis of the parameter settings showing significant changes with age, i.e., for the approximate entropy in the alpha- (A) and beta-band (B), the permutation entropy in the beta-band (C), as well as for the relative alpha- (D) and beta-band power (E).**

yr: year
